# Supplementary material for: Identification of Nifurtimox and Chrysin as Anti-Influenza Virus Agents by Clinical Transcriptome Signature Reversion
Source: MDPI journal article supplement (doi:10.3390/ijms23042372), 2022-02-21
Supplement: s1 [file s1]

**Table S5. A list of 158 host factors related to influenza virus infection verified *in vivo***

| Gene symbol     | Entrez ID | The direction of gene expression                           |            |
|-----------------|-----------|------------------------------------------------------------|------------|
|                 |           | conductive to influenza virus clearance or host resistance | References |
| <i>LCAD</i>     | 33        | Up-regulated                                               | [1]        |
| <i>ADORA1</i>   | 134       | Down-regulated                                             | [2]        |
| <i>ANXA1</i>    | 301       | Contradictory                                              | [3,4]      |
| <i>SAP</i>      | 325       | Contradictory                                              | [5]        |
| <i>BIRC3</i>    | 330       | Up-regulated                                               | [6]        |
| <i>ARNTL</i>    | 406       | Up-regulated                                               | [7]        |
| <i>AXL</i>      | 558       | Up-regulated                                               | [8]        |
| <i>BCL2A1</i>   | 597       | Inessential                                                | [9]        |
| <i>C3</i>       | 718       | Up-regulated                                               | [10]       |
| <i>C4A</i>      | 720       | Up-regulated                                               | [10]       |
| <i>C4B</i>      | 721       | Up-regulated                                               | [10]       |
| <i>C5</i>       | 727       | Inessential                                                | [10]       |
| <i>CAMP</i>     | 820       | Up-regulated                                               | [11]       |
| <i>CASP1</i>    | 834       | Up-regulated                                               | [12]       |
| <i>CASP6</i>    | 839       | Up-regulated                                               | [13]       |
| <i>CD79A</i>    | 973       | Inessential                                                | [14]       |
| <i>CCR2</i>     | 1231      | Down-regulated                                             | [15]       |
| <i>CCR5</i>     | 1234      | Up-regulated                                               | [16]       |
| <i>TPL2</i>     | 1326      | Up-regulated                                               | [17]       |
| <i>CRP</i>      | 1401      | Down-regulated                                             | [18]       |
| <i>CSF2</i>     | 1437      | Up-regulated                                               | [19]       |
| <i>CSF2RA</i>   | 1438      | Up-regulated                                               | [20]       |
| <i>CSF2RB</i>   | 1439      | Up-regulated                                               | [19]       |
| <i>NOX2</i>     | 1536      | Down-regulated                                             | [21]       |
| <i>S1P1</i>     | 1901      | Up-regulated                                               | [22]       |
| <i>SERPINB1</i> | 1992      | Up-regulated                                               | [23]       |
| <i>FAP</i>      | 2191      | Inessential                                                | [24]       |
| <i>FCER1G</i>   | 2207      | Up-regulated                                               | [25]       |
| <i>FGF2</i>     | 2247      | Up-regulated                                               | [26]       |
| <i>FHL2</i>     | 2274      | Down-regulated                                             | [27]       |
| <i>FMRP</i>     | 2332      | Down-regulated                                             | [28]       |
| <i>ADAP</i>     | 2533      | Up-regulated                                               | [29]       |
| <i>GALNT3</i>   | 2591      | Up-regulated                                               | [30]       |
| <i>CXCR3</i>    | 2833      | Down-regulated                                             | [31]       |
| <i>CXCL2</i>    | 2920      | Down-regulated                                             | [32]       |
| <i>IFI35</i>    | 3430      | Down-regulated                                             | [33]       |
| <i>IFIT1</i>    | 3434      | Inessential                                                | [34]       |
| <i>IFNAR1</i>   | 3454      | Up-regulated                                               | [35]       |
| <i>IFNAR2</i>   | 3455      | Up-regulated                                               | [36]       |
| <i>IFNG</i>     | 3458      | Contradictory                                              | [37,38]    |
| <i>IGHM</i>     | 3507      | Up-regulated                                               | [39]       |

|                 |      |                |      |
|-----------------|------|----------------|------|
| <i>IL1A</i>     | 3552 | Up-regulated   | [40] |
| <i>IL1B</i>     | 3553 | Up-regulated   | [40] |
| <i>IL1R1</i>    | 3554 | Up-regulated   | [40] |
| <i>IL6</i>      | 3569 | Up-regulated   | [41] |
| <i>IL7</i>      | 3574 | Inessential    | [42] |
| <i>IL10</i>     | 3586 | Down-regulated | [43] |
| <i>IL12A</i>    | 3592 | Up-regulated   | [44] |
| <i>IL12B</i>    | 3593 | Up-regulated   | [44] |
| <i>IL15</i>     | 3600 | Down-regulated | [45] |
| <i>IL17A</i>    | 3605 | Down-regulated | [46] |
| <i>IL18</i>     | 3606 | Up-regulated   | [47] |
| <i>CXCL10</i>   | 3627 | Down-regulated | [31] |
| <i>IRF3</i>     | 3661 | Up-regulated   | [48] |
| <i>IRF5</i>     | 3663 | Down-regulated | [49] |
| <i>IRF7</i>     | 3665 | Up-regulated   | [48] |
| <i>ASK1</i>     | 4217 | Up-regulated   | [50] |
| <i>MLK3</i>     | 4296 | Inessential    | [51] |
| <i>CD200</i>    | 4345 | Up-regulated   | [52] |
| <i>MPO</i>      | 4353 | Down-regulated | [53] |
| <i>MX1</i>      | 4599 | Up-regulated   | [54] |
| <i>MYD88</i>    | 4615 | Up-regulated   | [55] |
| <i>NFE2L2</i>   | 4780 | Up-regulated   | [56] |
| <i>NOS2</i>     | 4843 | Down-regulated | [57] |
| <i>NRAS</i>     | 4893 | Up-regulated   | [58] |
| <i>P2XR7</i>    | 5027 | Down-regulated | [59] |
| <i>SERPINE1</i> | 5054 | Up-regulated   | [60] |
| <i>PCBP2</i>    | 5094 | Down-regulated | [61] |
| <i>CXCL4</i>    | 5196 | Up-regulated   | [62] |
| <i>PIK3CG</i>   | 5294 | Up-regulated   | [63] |
| <i>PLG</i>      | 5340 | Down-regulated | [64] |
| <i>PKR</i>      | 5610 | Up-regulated   | [65] |
| <i>PRNP</i>     | 5621 | Up-regulated   | [66] |
| <i>PTAFR</i>    | 5724 | Down-regulated | [67] |
| <i>PTX3</i>     | 5806 | Up-regulated   | [68] |
| <i>RAG2</i>     | 5897 | Up-regulated   | [69] |
| <i>RNASEL</i>   | 6041 | Up-regulated   | [70] |
| <i>CCL2</i>     | 6347 | Down-regulated | [71] |
| <i>SFTPD</i>    | 6441 | Up-regulated   | [72] |
| <i>ST6GAL1</i>  | 6480 | Inessential    | [73] |
| <i>SOD1</i>     | 6647 | Up-regulated   | [74] |
| <i>SOD2</i>     | 6648 | Up-regulated   | [74] |
| <i>SOD3</i>     | 6649 | Up-regulated   | [74] |
| <i>STAT1</i>    | 6772 | Up-regulated   | [75] |
| <i>STAT2</i>    | 6773 | Up-regulated   | [76] |
| <i>TGFB1</i>    | 7040 | Up-regulated   | [77] |
| <i>TGFB2</i>    | 7042 | Up-regulated   | [77] |

|                 |       |                |          |
|-----------------|-------|----------------|----------|
| <i>TGFB3</i>    | 7043  | Up-regulated   | [77]     |
| <i>TLR2</i>     | 7097  | Contradictory  | [78,79]  |
| <i>TLR3</i>     | 7098  | Contradictory  | [79,80]  |
| <i>TLR4</i>     | 7099  | Contradictory  | [78,79]  |
| <i>TMPRSS2</i>  | 7113  | Down-regulated | [81]     |
| <i>TNF</i>      | 7124  | Up-regulated   | [82]     |
| <i>TNFAIP3</i>  | 7128  | Down-regulated | [83]     |
| <i>TP53</i>     | 7157  | Up-regulated   | [84]     |
| <i>UBE1L</i>    | 7318  | Up-regulated   | [85]     |
| <i>OASL</i>     | 8638  | Up-regulated   | [70,86]  |
| <i>MARCO</i>    | 8685  | Down-regulated | [87]     |
| <i>TNFSF10</i>  | 8743  | Contradictory  | [88,89]  |
| <i>RIPK2</i>    | 8767  | Up-regulated   | [90]     |
| <i>TNFRSF18</i> | 8784  | Up-regulated   | [91]     |
| <i>NCR1</i>     | 9437  | Up-regulated   | [92]     |
| <i>AIM2</i>     | 9447  | Contradictory  | [93,94]  |
| <i>THEMIS2</i>  | 9473  | Inessential    | [95]     |
| <i>PTGES</i>    | 9536  | Down-regulated | [96]     |
| <i>CXCL14</i>   | 9547  | Inessential    | [97]     |
| <i>ISG15</i>    | 9636  | Up-regulated   | [85,98]  |
| <i>SOCS5</i>    | 9655  | Up-regulated   | [99]     |
| <i>MVP</i>      | 9961  | Up-regulated   | [100]    |
| <i>ZMPSTE24</i> | 10269 | Up-regulated   | [101]    |
| <i>IFITM3</i>   | 10410 | Up-regulated   | [102]    |
| <i>MINDIN</i>   | 10417 | Up-regulated   | [103]    |
| <i>ATG7</i>     | 10533 | Down-regulated | [104]    |
| <i>RIPK3</i>    | 11035 | Up-regulated   | [105]    |
| <i>ADAMTS5</i>  | 11096 | Up-regulated   | [106]    |
| <i>IRAK3</i>    | 11213 | Up-regulated   | [107]    |
| <i>ATG14</i>    | 22863 | Down-regulated | [104]    |
| <i>PAD4</i>     | 23569 | Inessential    | [108]    |
| <i>DDX58</i>    | 23586 | Up-regulated   | [109]    |
| <i>CLEC5A</i>   | 23601 | Down-regulated | [110]    |
| <i>TRIM29</i>   | 23650 | Down-regulated | [111]    |
| <i>IL17RA</i>   | 23765 | Down-regulated | [46]     |
| <i>NOX1</i>     | 27035 | Down-regulated | [21]     |
| <i>DMAC2L</i>   | 27109 | Up-regulated   | [10]     |
| <i>ASC</i>      | 29108 | Up-regulated   | [112]    |
| <i>DUOX2</i>    | 50506 | Up-regulated   | [113]    |
| <i>NOX4</i>     | 50507 | Down-regulated | [21]     |
| <i>NOX3</i>     | 50508 | Down-regulated | [21]     |
| <i>IL21R</i>    | 50615 | Inessential    | [114]    |
| <i>TLR7</i>     | 51284 | Up-regulated   | [79,115] |
| <i>DUOX1</i>    | 53905 | Down-regulated | [21]     |
| <i>ATG16L1</i>  | 55054 | Up-regulated   | [116]    |
| <i>IL36G</i>    | 56300 | Up-regulated   | [117]    |

|             |              |                     |              |
|-------------|--------------|---------------------|--------------|
| MAVS        | 57506        | Up-regulated        | [109]        |
| EPG5        | 57724        | Down-regulated      | [104]        |
| NLRC4       | 58484        | Inessential         | [112]        |
| ACE2        | 59272        | Up-regulated        | [118]        |
| NOD2        | 64127        | Inessential         | [119]        |
| CARD9       | 64170        | Down-regulated      | [120]        |
| NOX5        | 79400        | Down-regulated      | [21]         |
| NLRX1       | 79671        | Inessential         | [121]        |
| <b>ZBP1</b> | <b>81030</b> | <b>Up-regulated</b> | <b>[122]</b> |
| UNC93B1     | 81622        | Inessential         | [123]        |
| TRIM56      | 81844        | Inessential         | [124]        |
| NLRC5       | 84166        | Inessential         | [125]        |
| RSAD2       | 91543        | Inessential         | [126]        |
| NLRP3       | 114548       | Up-regulated        | [12,112]     |
| SOCS4       | 122809       | Up-regulated        | [99]         |
| CD200R      | 131450       | Up-regulated        | [52]         |
| PAR1        | 145624       | Down-regulated      | [127]        |
| TRIF        | 148022       | Down-regulated      | [78]         |
| IFNLR1      | 163702       | Up-regulated        | [128]        |
| MLKL        | 197259       | Inessential         | [129]        |
| SPRED2      | 200734       | Up-regulated        | [130]        |
| TREML4      | 285852       | Up-regulated        | [131]        |
| SFTPA1      | 653509       | Up-regulated        | [132]        |
| SFTPA2      | 729238       | Up-regulated        | [132]        |
| IRG1        | 730249       | Inessential         | [133]        |

The 28 genes in this list overlapped with the 784 DEGs derived from IAV-infected patients are highlighted.

### Supplementary References

- Shinde, A.; Luo, J.; Bharathi, S.S.; Shi, H.; Beck, M.E.; McHugh, K.J.; Alcorn, J.F.; Wang, J.; Goetzman, E.S. Increased Mortality from Influenza Infection in Long-Chain Acyl-CoA Dehydrogenase Knockout Mice. *Biochem Biophys Res Commun* **2018**, *497*, 700–704, doi:10.1016/j.bbrc.2018.02.135.
- Davis, I.C. Cardiopulmonary Dysfunction And Lung Injury Are Attenuated In Influenza-Infected A1-Adenosine Receptor-Knockout Mice. In *Dinfluences and Outcomes of Respiratory Viral Infections*; American Thoracic Society International Conference Abstracts; American Thoracic Society: New York, NY, USA, 2012; p. A5714.
- Aeffner, F.; Woods, P.S.; Davis, I.C. Activation of A1-Adenosine Receptors Promotes Leukocyte Recruitment to the Lung and Attenuates Acute Lung Injury in Mice Infected with Influenza A/WSN/33 (H1N1) Virus. *J Virol* **2014**, *88*, 10214–10227, doi:10.1128/JVI.01068-14.
- Schloer, S.; Hübel, N.; Masemann, D.; Pajonczyk, D.; Brunotte, L.; Ehrhardt, C.; Brandenburg, L.-O.; Ludwig, S.; Gerke, V.; Rescher, U. The Annexin A1/FPR2 Signaling Axis Expands Alveolar Macrophages, Limits Viral Replication, and Attenuates Pathogenesis in the Murine Influenza A Virus Infection Model. *FASEB J* **2019**, *33*, 12188–12199, doi:10.1096/fj.201901265R.
- Herbert, J.; Hutchinson, W.L.; Carr, J.; Ives, J.; Jakob-Roetne, R.; Yamamura, K.-I.; Suzuki, M.; Pepys, M.B. Influenza Virus Infection Is Not Affected by Serum Amyloid P Component. *Mol Med* **2002**, *8*, 9–15.
- Rodrigue-Gervais, I.G.; Labbé, K.; Dagenais, M.; Dupaul-Chicoine, J.; Champagne, C.; Morizot, A.; Skeldon, A.; Brincks, E.L.; Vidal, S.M.; Griffith, T.S.; et al. Cellular Inhibitor of Apoptosis Protein CIAP2 Protects against Pulmonary Tissue Necrosis during Influenza Virus Infection to Promote Host Survival. *Cell Host Microbe* **2014**, *15*, 23–35, doi:10.1016/j.chom.2013.12.003.
- Sundar, I.K.; Ahmad, T.; Yao, H.; Hwang, J.; Gerloff, J.; Lawrence, B.P.; Sellix, M.T.; Rahman, I. Influenza A Virus-Dependent Remodeling of Pulmonary Clock Function in a Mouse Model of COPD. *Sci Rep* **2015**, *4*, 9927, doi:10.1038/srep09927.

8. Schmid, E.T.; Pang, I.K.; Carrera Silva, E.A.; Bosurgi, L.; Miner, J.J.; Diamond, M.S.; Iwasaki, A.; Rothlin, C.V. AXL Receptor Tyrosine Kinase Is Required for T Cell Priming and Antiviral Immunity. *Elife* **2016**, *5*, e12414, doi:10.7554/eLife.12414.
9. Tuzlak, S.; Schenk, R.L.; Vasanthakumar, A.; Preston, S.P.; Haschka, M.D.; Zotos, D.; Kallies, A.; Strasser, A.; Villunger, A.; Herold, M.J. The BCL-2 pro-Survival Protein A1 Is Dispensable for T Cell Homeostasis on Viral Infection. *Cell Death Differ* **2017**, *24*, 523–533, doi:10.1038/cdd.2016.155.
10. Rattan, A.; Pawar, S.D.; Nawadkar, R.; Kulkarni, N.; Lal, G.; Mullick, J.; Sahu, A. Synergy between the Classical and Alternative Pathways of Complement Is Essential for Conferring Effective Protection against the Pandemic Influenza A(H1N1) 2009 Virus Infection. *PLoS Pathog* **2017**, *13*, e1006248, doi:10.1371/journal.ppat.1006248.
11. Barlow, P.G.; Svoboda, P.; Mackellar, A.; Nash, A.A.; York, I.A.; Pohl, J.; Davidson, D.J.; Donis, R.O. Antiviral Activity and Increased Host Defense against Influenza Infection Elicited by the Human Cathelicidin LL-37. *PLoS One* **2011**, *6*, e25333, doi:10.1371/journal.pone.0025333.
12. Thomas, P.G.; Dash, P.; Aldridge, J.R.; Ellebedy, A.H.; Reynolds, C.; Funk, A.J.; Martin, W.J.; Lamkanfi, M.; Webby, R.J.; Boyd, K.L.; et al. The Intracellular Sensor NLRP3 Mediates Key Innate and Healing Responses to Influenza A Virus via the Regulation of Caspase-1. *Immunity* **2009**, *30*, 566–575, doi:10.1016/j.immuni.2009.02.006.
13. Zheng, M.; Karki, R.; Vogel, P.; Kanneganti, T.-D. Caspase-6 Is a Key Regulator of Innate Immunity, Inflammasome Activation, and Host Defense. *Cell* **2020**, *181*, 674–687.e13, doi:10.1016/j.cell.2020.03.040.
14. Mbawuike, I.N.; Pacheco, S.; Acuna, C.L.; Switzer, K.C.; Zhang, Y.; Harriman, G.R. Mucosal Immunity to Influenza without IgA: An IgA Knockout Mouse Model. *J Immunol* **1999**, *162*, 2530–2537.
15. Herold, S.; Steinmueller, M.; von Wulffen, W.; Cakarova, L.; Pinto, R.; Pleschka, S.; Mack, M.; Kuziel, W.A.; Corazza, N.; Brunner, T.; et al. Lung Epithelial Apoptosis in Influenza Virus Pneumonia: The Role of Macrophage-Expressed TNF-Related Apoptosis-Inducing Ligand. *J Exp Med* **2008**, *205*, 3065–3077, doi:10.1084/jem.20080201.
16. Dawson, T.C.; Beck, M.A.; Kuziel, W.A.; Henderson, F.; Maeda, N. Contrasting Effects of CCR5 and CCR2 Deficiency in the Pulmonary Inflammatory Response to Influenza A Virus. *Am J Pathol* **2000**, *156*, 1951–1959, doi:10.1016/S0002-9440(10)65068-7.
17. Kuriakose, T.; Tripp, R.A.; Watford, W.T. Tumor Progression Locus 2 Promotes Induction of IFN $\lambda$ , Interferon Stimulated Genes and Antigen-Specific CD8 $^{+}$  T Cell Responses and Protects against Influenza Virus. *PLoS Pathog* **2015**, *11*, e1005038, doi:10.1371/journal.ppat.1005038.
18. Gao, R.; Wang, L.; Bai, T.; Zhang, Y.; Bo, H.; Shu, Y. C-Reactive Protein Mediating Immunopathological Lesions: A Potential Treatment Option for Severe Influenza A Diseases. *EBioMedicine* **2017**, *22*, 133–142, doi:10.1016/j.ebiom.2017.07.010.
19. Schneider, C.; Nobs, S.P.; Heer, A.K.; Kurrer, M.; Klinke, G.; van Rooijen, N.; Vogel, J.; Kopf, M. Alveolar Macrophages Are Essential for Protection from Respiratory Failure and Associated Morbidity Following Influenza Virus Infection. *PLoS Pathog* **2014**, *10*, e1004053, doi:10.1371/journal.ppat.1004053.
20. Li, F.; Okreglicka, K.M.; Pohlmeier, L.M.; Schneider, C.; Kopf, M. Long-Term Culture of Fetal Monocyte Precursors In Vitro Allowing the Generation of Bona Fide Alveolar Macrophages In Vivo. *bioRxiv* **2021**. <https://doi.org/10.1101/2021.06.04.447115>.
21. Snelgrove, R.J.; Edwards, L.; Rae, A.J.; Hussell, T. An Absence of Reactive Oxygen Species Improves the Resolution of Lung Influenza Infection. *Eur J Immunol* **2006**, *36*, 1364–1373, doi:10.1002/eji.200635977.
22. Teijaro, J.R.; Walsh, K.B.; Cahalan, S.; Fremgen, D.M.; Roberts, E.; Scott, F.; Martinborough, E.; Peach, R.; Oldstone, M.B.A.; Rosen, H. Endothelial Cells Are Central Orchestrators of Cytokine Amplification during Influenza Virus Infection. *Cell* **2011**, *146*, 980–991, doi:10.1016/j.cell.2011.08.015.
23. Farley, K.; Stolley, J.M.; Zhao, P.; Cooley, J.; Remold-O'Donnell, E. A SerpinB1 Regulatory Mechanism Is Essential for Restricting Neutrophil Extracellular Trap Generation. *J Immunol* **2012**, *189*, 4574–4581, doi:10.4049/jimmunol.1201167.
24. Tan, S.-Y.; Chowdhury, S.; Polak, N.; Gorrell, M.D.; Weninger, W. Fibroblast Activation Protein Is Dispensable in the Anti-Influenza Immune Response in Mice. *PLoS One* **2017**, *12*, e0171194, doi:10.1371/journal.pone.0171194.
25. DiLillo, D.J.; Tan, G.S.; Palese, P.; Ravetch, J.V. Broadly Neutralizing Hemagglutinin Stalk-Specific Antibodies Require Fc $\gamma$ R Interactions for Protection against Influenza Virus in Vivo. *Nat Med* **2014**, *20*, 143–151, doi:10.1038/nm.3443.
26. Wang, K.; Lai, C.; Li, T.; Wang, C.; Wang, W.; Ni, B.; Bai, C.; Zhang, S.; Han, L.; Gu, H.; et al. Basic Fibroblast Growth Factor Protects against Influenza A Virus-Induced Acute Lung Injury by Recruiting Neutrophils. *J Mol Cell Biol* **2018**, *10*, 573–585, doi:10.1093/jmcb/mjx047.
27. Masemann, D.; Leite Dantas, R.; Sitnik, S.; Schied, T.; Nordhoff, C.; Ludwig, S.; Wixler, V. The Four-and-a-Half LIM Domain Protein 2 Supports Influenza A Virus-Induced Lung Inflammation by Restricting the Host

Adaptive Immune Response. *Am J Pathol* **2018**, *188*, 1236–1245, doi:10.1016/j.ajpath.2018.02.004.

28. Zhou, Z.; Cao, M.; Guo, Y.; Zhao, L.; Wang, J.; Jia, X.; Li, J.; Wang, C.; Gabriel, G.; Xue, Q.; et al. Fragile X Mental Retardation Protein Stimulates Ribonucleoprotein Assembly of Influenza A Virus. *Nat Commun* **2014**, *5*, 3259, doi:10.1038/ncomms4259.
29. Li, C.; Jiao, S.; Wang, G.; Gao, Y.; Liu, C.; He, X.; Zhang, C.; Xiao, J.; Li, W.; Zhang, G.; et al. The Immune Adaptor ADAP Regulates Reciprocal TGF- $\beta$ 1-Integrin Crosstalk to Protect from Influenza Virus Infection. *PLoS Pathog* **2015**, *11*, e1004824, doi:10.1371/journal.ppat.1004824.
30. Nakamura, S.; Horie, M.; Daidoji, T.; Honda, T.; Yasugi, M.; Kuno, A.; Komori, T.; Okuzaki, D.; Narimatsu, H.; Nakaya, T.; et al. Influenza A Virus-Induced Expression of a GalNAc Transferase, GALNT3, via MicroRNAs Is Required for Enhanced Viral Replication. *J Virol* **2016**, *90*, 1788–1801, doi:10.1128/JVI.02246-15.
31. Ichikawa, A.; Kuba, K.; Morita, M.; Chida, S.; Tezuka, H.; Hara, H.; Sasaki, T.; Ohteki, T.; Ranieri, V.M.; dos Santos, C.C.; et al. CXCL10-CXCR3 Enhances the Development of Neutrophil-Mediated Fulminant Lung Injury of Viral and Nonviral Origin. *Am J Respir Crit Care Med* **2013**, *187*, 65–77, doi:10.1164/rccm.201203-0508OC.
32. Sakai, S.; Kawamata, H.; Mantani, N.; Kogure, T.; Shimada, Y.; Terasawa, K.; Sakai, T.; Imanishi, N.; Ochiai, H. Therapeutic Effect of Anti-Macrophage Inflammatory Protein 2 Antibody on Influenza Virus-Induced Pneumonia in Mice. *J Virol* **2000**, *74*, 2472–2476, doi:10.1128/jvi.74.5.2472-2476.2000.
33. Gounder, A.P.; Yokoyama, C.C.; Jarjour, N.N.; Bricker, T.L.; Edelson, B.T.; Boon, A.C.M. Interferon Induced Protein 35 Exacerbates H5N1 Influenza Disease through the Expression of IL-12p40 Homodimer. *PLoS Pathog* **2018**, *14*, e1007001, doi:10.1371/journal.ppat.1007001.
34. Pinto, A.K.; Williams, G.D.; Szretter, K.J.; White, J.P.; Proença-Módena, J.L.; Liu, G.; Olejnik, J.; Brien, J.D.; Ebihara, H.; Mühlberger, E.; et al. Human and Murine IFIT1 Proteins Do Not Restrict Infection of Negative-Sense RNA Viruses of the Orthomyxoviridae, Bunyaviridae, and Filoviridae Families. *J Virol* **2015**, *89*, 9465–9476, doi:10.1128/JVI.00996-15.
35. Szretter, K.J.; Gangappa, S.; Belser, J.A.; Zeng, H.; Chen, H.; Matsuoka, Y.; Sambhara, S.; Swayne, D.E.; Tumpey, T.M.; Katz, J.M. Early Control of H5N1 Influenza Virus Replication by the Type I Interferon Response in Mice. *J. Virol.* **2009**, *83*, 5825–5834. <https://doi.org/10.1128/JVI.02144-08>.
36. Shepardson, K.M.; Larson, K.; Johns, L.L.; Stanek, K.; Cho, H.; Wellham, J.; Henderson, H.; Rynda-Apple, A. IFNAR2 Is Required for Anti-Influenza Immunity and Alters Susceptibility to Post-Influenza Bacterial Superinfections. *Front Immunol* **2018**, *9*, 2589, doi:10.3389/fimmu.2018.02589.
37. Liu, B.; Bao, L.; Wang, L.; Li, F.; Wen, M.; Li, H.; Deng, W.; Zhang, X.; Cao, B. Anti-IFN- $\gamma$  Therapy Alleviates Acute Lung Injury Induced by Severe Influenza A (H1N1) Pdm09 Infection in Mice. *J Microbiol Immunol Infect* **2021**, *54*, 396–403, doi:10.1016/j.jmii.2019.07.009.
38. Weiss, I.D.; Wald, O.; Wald, H.; Beider, K.; Abraham, M.; Galun, E.; Nagler, A.; Peled, A. IFN-Gamma Treatment at Early Stages of Influenza Virus Infection Protects Mice from Death in a NK Cell-Dependent Manner. *J Interferon Cytokine Res* **2010**, *30*, 439–449, doi:10.1089/jir.2009.0084.
39. Kopf, M.; Brombacher, F.; Bachmann, M.F. Role of IgM Antibodies versus B Cells in Influenza Virus-Specific Immunity. *Eur J Immunol* **2002**, *32*, 2229–2236, doi:10.1002/1521-4141(200208)32:8<2229::AID-IMMU2229>3.0.CO;2-T.
40. Schmitz, N.; Kurrer, M.; Bachmann, M.F.; Kopf, M. Interleukin-1 Is Responsible for Acute Lung Immunopathology but Increases Survival of Respiratory Influenza Virus Infection. *J Virol* **2005**, *79*, 6441–6448, doi:10.1128/JVI.79.10.6441-6448.2005.
41. Lauder, S.N.; Jones, E.; Smart, K.; Bloom, A.; Williams, A.S.; Hindley, J.P.; Ondondo, B.; Taylor, P.R.; Clement, M.; Fielding, C.; et al. Interleukin-6 Limits Influenza-Induced Inflammation and Protects against Fatal Lung Pathology. *Eur J Immunol* **2013**, *43*, 2613–2625, doi:10.1002/eji.201243018.
42. Kang, M.C.; Choi, D.-H.; Choi, Y.W.; Park, S.J.; Namkoong, H.; Park, K.S.; Ahn, S.-S.; Surh, C.D.; Yoon, S.-W.; Kim, D.-J.; et al. Intranasal Introduction of Fc-Fused Interleukin-7 Provides Long-Lasting Prophylaxis against Lethal Influenza Virus Infection. *J Virol* **2015**, *90*, 2273–2284, doi:10.1128/JVI.02768-15.
43. Sun, K.; Torres, L.; Metzger, D.W. A Detrimental Effect of Interleukin-10 on Protective Pulmonary Humoral Immunity during Primary Influenza A Virus Infection. *J Virol* **2010**, *84*, 5007–5014, doi:10.1128/JVI.02408-09.
44. Monteiro, J.M.; Harvey, C.; Trinchieri, G. Role of Interleukin-12 in Primary Influenza Virus Infection. *J Virol* **1998**, *72*, 4825–4831, doi:10.1128/JVI.72.6.4825-4831.1998.
45. Abdul-Careem, M.F.; Mian, M.F.; Yue, G.; Gillgrass, A.; Chenoweth, M.J.; Barra, N.G.; Chew, M.V.; Chan, T.; Al-Garawi, A.A.; Jordana, M.; et al. Critical Role of Natural Killer Cells in Lung Immunopathology during Influenza Infection in Mice. *J Infect Dis* **2012**, *206*, 167–177, doi:10.1093/infdis/jis340.
46. Crowe, C.R.; Chen, K.; Pociask, D.A.; Alcorn, J.F.; Krivich, C.; Enelow, R.I.; Ross, T.M.; Witztum, J.L.; Kolls, J.K. Critical Role of IL-17RA in Immunopathology of Influenza Infection. *J Immunol* **2009**, *183*, 5301–5310, doi:10.4049/jimmunol.0900995.
47. Denton, A.E.; Doherty, P.C.; Turner, S.J.; La Gruta, N.L. IL-18, but Not IL-12, Is Required for Optimal Cytokine Production by Influenza Virus-Specific CD8<sup>+</sup> T Cells. *Eur J Immunol* **2007**, *37*, 368–375,

doi:10.1002/eji.200636766.

48. Hatesuer, B.; Hoang, H.T.T.; Riese, P.; Trittel, S.; Gerhauser, I.; Elbahesh, H.; Geffers, R.; Wilk, E.; Schughart, K. Deletion of Irf3 and Irf7 Genes in Mice Results in Altered Interferon Pathway Activation and Granulocyte-Dominated Inflammatory Responses to Influenza A Infection. *J Innate Immun* **2017**, *9*, 145–161, doi:10.1159/000450705.
49. Forbester, J.L.; Clement, M.; Wellington, D.; Yeung, A.; Dimonte, S.; Marsden, M.; Chapman, L.; Coomber, E.L.; Tolley, C.; Lees, E.; et al. IRF5 Promotes Influenza Virus-Induced Inflammatory Responses in Human Induced Pluripotent Stem Cell-Derived Myeloid Cells and Murine Models. *J Virol* **2020**, *94*, e00121-20, doi:10.1128/JVI.00121-20.
50. Okazaki, T.; Higuchi, M.; Takeda, K.; Iwatsuki-Horimoto, K.; Kiso, M.; Miyagishi, M.; Yanai, H.; Kato, A.; Yoneyama, M.; Fujita, T.; et al. The ASK Family Kinases Differentially Mediate Induction of Type I Interferon and Apoptosis during the Antiviral Response. *Sci Signal* **2015**, *8*, ra78, doi:10.1126/scisignal.aab1883.
51. Desmet, E.A.; Hollenbaugh, J.A.; Sime, P.J.; Wright, T.W.; Topham, D.J.; Sant, A.J.; Takimoto, T.; Dewhurst, S.; Maggirwar, S.B. Mixed Lineage Kinase 3 Deficiency Delays Viral Clearance in the Lung and Is Associated with Diminished Influenza-Induced Cytopathic Effect in Infected Cells. *Virology* **2010**, *400*, 224–232, doi:10.1016/j.virol.2010.02.001.
52. Snelgrove, R.J.; Goulding, J.; Didierlaurent, A.M.; Lyonga, D.; Vekaria, S.; Edwards, L.; Gwyer, E.; Sedgwick, J.D.; Barclay, A.N.; Hussell, T. A Critical Function for CD200 in Lung Immune Homeostasis and the Severity of Influenza Infection. *Nat Immunol* **2008**, *9*, 1074–1083, doi:10.1038/ni.1637.
53. Sugamata, R.; Dobashi, H.; Nagao, T.; Yamamoto, K.-I.; Nakajima, N.; Sato, Y.; Aratani, Y.; Oshima, M.; Sata, T.; Kobayashi, K.; et al. Contribution of Neutrophil-Derived Myeloperoxidase in the Early Phase of Fulminant Acute Respiratory Distress Syndrome Induced by Influenza Virus Infection. *Microbiol Immunol* **2012**, *56*, 171–182, doi:10.1111/j.1348-0421.2011.00424.x.
54. Pavlovic, J.; Arzet, H.A.; Hefti, H.P.; Frese, M.; Rost, D.; Ernst, B.; Kolb, E.; Staeheli, P.; Haller, O. Enhanced Virus Resistance of Transgenic Mice Expressing the Human MxA Protein. *J Virol* **1995**, *69*, 4506–4510, doi:10.1128/JVI.69.7.4506-4510.1995.
55. Ito, T.; Allen, R.M.; Carson, W.F.; Schaller, M.; Cavassani, K.A.; Hogaboam, C.M.; Lukacs, N.W.; Matsukawa, A.; Kunkel, S.L. The Critical Role of Notch Ligand Delta-like 1 in the Pathogenesis of Influenza A Virus (H1N1) Infection. *PLoS Pathog* **2011**, *7*, e1002341, doi:10.1371/journal.ppat.1002341.
56. Yageta, Y.; Ishii, Y.; Morishima, Y.; Masuko, H.; Ano, S.; Yamadori, T.; Itoh, K.; Takeuchi, K.; Yamamoto, M.; Hizawa, N. Role of Nrf2 in Host Defense against Influenza Virus in Cigarette Smoke-Exposed Mice. *J Virol* **2011**, *85*, 4679–4690, doi:10.1128/JVI.02456-10.
57. Karupiah, G.; Chen, J.H.; Mahalingam, S.; Nathan, C.F.; MacMicking, J.D. Rapid Interferon Gamma-Dependent Clearance of Influenza A Virus and Protection from Consolidating Pneumonitis in Nitric Oxide Synthase 2-Deficient Mice. *J Exp Med* **1998**, *188*, 1541–1546, doi:10.1084/jem.188.8.1541.
58. Pérez de Castro, I.; Diaz, R.; Malumbres, M.; Hernández, M.-I.; Jagirdar, J.; Jiménez, M.; Ahn, D.; Pellicer, A. Mice Deficient for N-Ras: Impaired Antiviral Immune Response and T-Cell Function. *Cancer Res* **2003**, *63*, 1615–1622.
59. Leyva-Grado, V.H.; Ermler, M.E.; Schotsaert, M.; Gonzalez, M.G.; Gillespie, V.; Lim, J.K.; García-Sastre, A. Contribution of the Purinergic Receptor P2X7 to Development of Lung Immunopathology during Influenza Virus Infection. *mBio* **2017**, *8*, e00229-17, doi:10.1128/mBio.00229-17.
60. Dittmann, M.; Hoffmann, H.-H.; Scull, M.A.; Gilmore, R.H.; Bell, K.L.; Ciancanelli, M.; Wilson, S.J.; Crotta, S.; Yu, Y.; Flatley, B.; et al. A Serpin Shapes the Extracellular Environment to Prevent Influenza A Virus Maturation. *Cell* **2015**, *160*, 631–643, doi:10.1016/j.cell.2015.01.040.
61. Li, X.; Fu, Z.; Liang, H.; Wang, Y.; Qi, X.; Ding, M.; Sun, X.; Zhou, Z.; Huang, Y.; Gu, H.; et al. H5N1 Influenza Virus-Specific MiRNA-like Small RNA Increases Cytokine Production and Mouse Mortality via Targeting Poly(RC)-Binding Protein 2. *Cell Res* **2018**, *28*, 157–171, doi:10.1038/cr.2018.3.
62. Guo, L.; Feng, K.; Wang, Y.C.; Mei, J.J.; Ning, R.T.; Zheng, H.W.; Wang, J.J.; Worthen, G.S.; Wang, X.; Song, J.; et al. Critical Role of CXCL4 in the Lung Pathogenesis of Influenza (H1N1) Respiratory Infection. *Mucosal Immunol* **2017**, *10*, 1529–1541, doi:10.1038/mi.2017.1.
63. Nobs, S.P.; Schneider, C.; Heer, A.K.; Huotari, J.; Helenius, A.; Kopf, M. PI3K $\gamma$  Is Critical for Dendritic Cell-Mediated CD8 $^{+}$  T Cell Priming and Viral Clearance during Influenza Virus Infection. *PLoS Pathog* **2016**, *12*, e1005508, doi:10.1371/journal.ppat.1005508.
64. Berri, F.; Rimmelzwaan, G.F.; Hanss, M.; Albina, E.; Foucault-Grunenwald, M.-L.; Lê, V.B.; Vogelzang-van Trierum, S.E.; Gil, P.; Camerer, E.; Martinez, D.; et al. Plasminogen Controls Inflammation and Pathogenesis of Influenza Virus Infections via Fibrinolysis. *PLoS Pathog* **2013**, *9*, e1003229, doi:10.1371/journal.ppat.1003229.
65. Balachandran, S.; Roberts, P.C.; Brown, L.E.; Truong, H.; Pattnaik, A.K.; Archer, D.R.; Barber, G.N. Essential Role for the DsRNA-Dependent Protein Kinase PKR in Innate Immunity to Viral Infection. *Immunity* **2000**, *13*,

129–141, doi:10.1016/s1074-7613(00)00014-5.

66. Chida, J.; Hara, H.; Yano, M.; Uchiyama, K.; Das, N.R.; Takahashi, E.; Miyata, H.; Tomioka, Y.; Ito, T.; Kido, H.; et al. Prion Protein Protects Mice from Lethal Infection with Influenza A Viruses. *PLoS Pathog* **2018**, *14*, e1007049, doi:10.1371/journal.ppat.1007049.
67. Garcia, C.C.; Russo, R.C.; Guabiraba, R.; Fagundes, C.T.; Polidoro, R.B.; Tavares, L.P.; Salgado, A.P.C.; Cassali, G.D.; Sousa, L.P.; Machado, A.V.; et al. Platelet-Activating Factor Receptor Plays a Role in Lung Injury and Death Caused by Influenza A in Mice. *PLoS Pathog* **2010**, *6*, e1001171, doi:10.1371/journal.ppat.1001171.
68. Reading, P.C.; Bozza, S.; Gilbertson, B.; Tate, M.; Moretti, S.; Job, E.R.; Crouch, E.C.; Brooks, A.G.; Brown, L.E.; Bottazzi, B.; et al. Antiviral Activity of the Long Chain Pentraxin PTX3 against Influenza Viruses. *J Immunol* **2008**, *180*, 3391–3398, doi:10.4049/jimmunol.180.5.3391.
69. Wu, H.; Haist, V.; Baumgärtner, W.; Schughart, K. Sustained Viral Load and Late Death in Rag2<sup>-/-</sup> Mice after Influenza A Virus Infection. *Virology* **2010**, *7*, 172, doi:10.1186/1743-422X-7-172.
70. Silverman, R.H. Viral Encounters with 2',5'-Oligoadenylate Synthetase and RNase L during the Interferon Antiviral Response. *J Virol* **2007**, *81*, 12720–12729, doi:10.1128/JVI.01471-07.
71. Lai, C.; Wang, K.; Zhao, Z.; Zhang, L.; Gu, H.; Yang, P.; Wang, X. C-C Motif Chemokine Ligand 2 (CCL2) Mediates Acute Lung Injury Induced by Lethal Influenza H7N9 Virus. *Front Microbiol* **2017**, *8*, 587, doi:10.3389/fmicb.2017.00587.
72. LeVine, A.M.; Whitsett, J.A.; Hartshorn, K.L.; Crouch, E.C.; Korfhagen, T.R. Surfactant Protein D Enhances Clearance of Influenza A Virus from the Lung in Vivo. *J Immunol* **2001**, *167*, 5868–5873, doi:10.4049/jimmunol.167.10.5868.
73. Glaser, L.; Conenello, G.; Paulson, J.; Palese, P. Effective Replication of Human Influenza Viruses in Mice Lacking a Major Alpha2,6 Sialyltransferase. *Virus Res* **2007**, *126*, 9–18, doi:10.1016/j.virusres.2007.01.011.
74. Oda, T.; Akaike, T.; Hamamoto, T.; Suzuki, F.; Hirano, T.; Maeda, H. Oxygen Radicals in Influenza-Induced Pathogenesis and Treatment with Pyran Polymer-Conjugated SOD. *Science* **1989**, *244*, 974–976, doi:10.1126/science.2543070.
75. Davidson, S.; Crotta, S.; McCabe, T.M.; Wack, A. Pathogenic Potential of Interferon Aβ in Acute Influenza Infection. *Nat Commun* **2014**, *5*, 3864, doi:10.1038/ncomms4864.
76. Gopal, R.; Lee, B.; McHugh, K.J.; Rich, H.E.; Ramanan, K.; Mandalapu, S.; Clay, M.E.; Seger, P.J.; Enelow, R.I.; Manni, M.L.; et al. STAT2 Signaling Regulates Macrophage Phenotype During Influenza and Bacterial Super-Infection. *Front Immunol* **2018**, *9*, 2151, doi:10.3389/fimmu.2018.02151.
77. Carlson, C.M.; Turpin, E.A.; Moser, L.A.; O'Brien, K.B.; Cline, T.D.; Jones, J.C.; Tumpey, T.M.; Katz, J.M.; Kelley, L.A.; Gaudie, J.; et al. Transforming Growth Factor-β: Activation by Neuraminidase and Role in Highly Pathogenic H5N1 Influenza Pathogenesis. *PLoS Pathog* **2010**, *6*, e1001136, doi:10.1371/journal.ppat.1001136.
78. Shirey, K.A.; Lai, W.; Patel, M.C.; Pletneva, L.M.; Pang, C.; Kurt-Jones, E.; Lipsky, M.; Roger, T.; Calandra, T.; Tracey, K.J.; et al. Novel Strategies for Targeting Innate Immune Responses to Influenza. *Mucosal Immunol* **2016**, *9*, 1173–1182, doi:10.1038/mi.2015.141.
79. Shinya, K.; Okamura, T.; Sueta, S.; Kasai, N.; Tanaka, M.; Ginting, T.E.; Makino, A.; Eisefeld, A.J.; Kawaoka, Y. Toll-like Receptor Pre-Stimulation Protects Mice against Lethal Infection with Highly Pathogenic Influenza Viruses. *Virology* **2011**, *8*, 97, doi:10.1186/1743-422X-8-97.
80. Le Goffic, R.; Balloy, V.; Lagranderie, M.; Alexopoulou, L.; Esciou, N.; Flavell, R.; Chignard, M.; Si-Tahar, M. Detrimental Contribution of the Toll-like Receptor (TLR)3 to Influenza A Virus-Induced Acute Pneumonia. *PLoS Pathog* **2006**, *2*, e53, doi:10.1371/journal.ppat.0020053.
81. Hatesuer, B.; Bertram, S.; Mehnert, N.; Bahgat, M.M.; Nelson, P.S.; Pöhlmann, S.; Pöhlmann, S.; Schughart, K. Tmprss2 Is Essential for Influenza H1N1 Virus Pathogenesis in Mice. *PLoS Pathog* **2013**, *9*, e1003774, doi:10.1371/journal.ppat.1003774.
82. DeBerge, M.P.; Ely, K.H.; Enelow, R.I. Soluble, but Not Transmembrane, TNF-α Is Required during Influenza Infection to Limit the Magnitude of Immune Responses and the Extent of Immunopathology. *J Immunol* **2014**, *192*, 5839–5851, doi:10.4049/jimmunol.1302729.
83. Maelfait, J.; Roose, K.; Bogaert, P.; Sze, M.; Saelens, X.; Pasparakis, M.; Carpentier, I.; van Loo, G.; Beyaert, R. A20 (Tnfrsf25) Deficiency in Myeloid Cells Protects against Influenza A Virus Infection. *PLoS Pathog* **2012**, *8*, e1002570, doi:10.1371/journal.ppat.1002570.
84. Yan, W.; Wei, J.; Deng, X.; Shi, Z.; Zhu, Z.; Shao, D.; Li, B.; Wang, S.; Tong, G.; Ma, Z. Transcriptional Analysis of Immune-Related Gene Expression in P53-Deficient Mice with Increased Susceptibility to Influenza A Virus Infection. *BMC Med Genomics* **2015**, *8*, 52, doi:10.1186/s12920-015-0127-8.
85. Lai, C.; Struckhoff, J.J.; Schneider, J.; Martinez-Sobrido, L.; Wolff, T.; García-Sastre, A.; Zhang, D.-E.; Lenschow, D.J. Mice Lacking the ISG15 E1 Enzyme UBE1L Demonstrate Increased Susceptibility to Both Mouse-Adapted and Non-Mouse-Adapted Influenza B Virus Infection. *J Virol* **2009**, *83*, 1147–1151, doi:10.1128/JVI.00105-08.
86. Zhu, J.; Zhang, Y.; Ghosh, A.; Cuevas, R.A.; Forero, A.; Dhar, J.; Ibsen, M.S.; Schmid-Burgk, J.L.; Schmidt, T.

- Ganapathiraju, M.K.; et al. Antiviral Activity of Human OASL Protein Is Mediated by Enhancing Signaling of the RIG-I RNA Sensor. *Immunity* **2014**, *40*, 936–948, doi:10.1016/j.immuni.2014.05.007.
87. Ghosh, S.; Gregory, D.; Smith, A.; Kobzik, L. MARCO Regulates Early Inflammatory Responses against Influenza: A Useful Macrophage Function with Adverse Outcome. *Am J Respir Cell Mol Biol* **2011**, *45*, 1036–1044, doi:10.1165/rcmb.2010-0349OC.
  88. Brincks, E.L.; Katewa, A.; Kucaba, T.A.; Griffith, T.S.; Legge, K.L. CD8 T Cells Utilize TRAIL to Control Influenza Virus Infection. *J Immunol* **2008**, *181*, 4918–4925, doi:10.4049/jimmunol.181.7.4918.
  89. Högner, K.; Wolff, T.; Pleschka, S.; Plog, S.; Gruber, A.D.; Kalinke, U.; Walmrath, H.-D.; Bodner, J.; Gattenlöhner, S.; Lewe-Schlosser, P.; et al. Correction: Macrophage-Expressed IFN- $\beta$  Contributes to Apoptotic Alveolar Epithelial Cell Injury in Severe Influenza Virus Pneumonia. *PLoS Pathog.* **2016**, *12*, e1005716. <https://doi.org/10.1371/journal.ppat.1005716>.
  90. Lupfer, C.; Thomas, P.G.; Anand, P.K.; Vogel, P.; Milasta, S.; Martinez, J.; Huang, G.; Green, M.; Kundu, M.; Chi, H.; et al. Receptor Interacting Protein Kinase 2-Mediated Mitophagy Regulates Inflammasome Activation during Virus Infection. *Nat Immunol* **2013**, *14*, 480–488, doi:10.1038/ni.2563.
  91. Snell, L.M.; McPherson, A.J.; Lin, G.H.Y.; Sakaguchi, S.; Pandolfi, P.P.; Riccardi, C.; Watts, T.H. CD8 T Cell-Intrinsic GTR Is Required for T Cell Clonal Expansion and Mouse Survival Following Severe Influenza Infection. *J Immunol* **2010**, *185*, 7223–7234, doi:10.4049/jimmunol.1001912.
  92. Gazit, R.; Gruda, R.; Elboim, M.; Arnon, T.I.; Katz, G.; Achdout, H.; Hanna, J.; Qimron, U.; Landau, G.; Greenbaum, E.; et al. Lethal Influenza Infection in the Absence of the Natural Killer Cell Receptor Gene Ncr1. *Nat Immunol* **2006**, *7*, 517–523, doi:10.1038/ni1322.
  93. Zhang, H.; Luo, J.; Alcorn, J.F.; Chen, K.; Fan, S.; Pilewski, J.; Liu, A.; Chen, W.; Kolls, J.K.; Wang, J. AIM2 Inflammasome Is Critical for Influenza-Induced Lung Injury and Mortality. *J Immunol* **2017**, *198*, 4383–4393, doi:10.4049/jimmunol.1600714.
  94. Schattgen, S.A.; Gao, G.; Kurt-Jones, E.A.; Fitzgerald, K.A. Cutting Edge: DNA in the Lung Microenvironment during Influenza Virus Infection Tempers Inflammation by Engaging the DNA Sensor AIM2. *J Immunol* **2016**, *196*, 29–33, doi:10.4049/jimmunol.1501048.
  95. Hartweger, H.; Schweighoffer, E.; Davidson, S.; Peirce, M.J.; Wack, A.; Tybulewicz, V.L.J. Themis2 Is Not Required for B Cell Development, Activation, and Antibody Responses. *J Immunol* **2014**, *193*, 700–707, doi:10.4049/jimmunol.1400943.
  96. Coulombe, F.; Jaworska, J.; Verway, M.; Tzelepis, F.; Massoud, A.; Gillard, J.; Wong, G.; Kobinger, G.; Xing, Z.; Couture, C.; et al. Targeted Prostaglandin E2 Inhibition Enhances Antiviral Immunity through Induction of Type I Interferon and Apoptosis in Macrophages. *Immunity* **2014**, *40*, 554–568, doi:10.1016/j.immuni.2014.02.013.
  97. Sidahmed, A.M.; Leon, A.J.; Banner, D.; Kelvin, A.A.; Rowe, T.; Boudakov, I.; Degousse, N.; Rubin, B.B.; Kelvin, D.J. CXCL14 Deficiency Does Not Impact the Outcome of Influenza or Escherichia Coli Infections in Mice. *J Infect Dev Ctries* **2014**, *8*, 1301–1306, doi:10.3855/jidc.3890.
  98. Lenschow, D.J.; Lai, C.; Frias-Staheli, N.; Giannakopoulos, N.V.; Lutz, A.; Wolff, T.; Osiak, A.; Levine, B.; Schmidt, R.E.; García-Sastre, A.; et al. IFN-Stimulated Gene 15 Functions as a Critical Antiviral Molecule against Influenza, Herpes, and Sindbis Viruses. *Proc Natl Acad Sci U S A* **2007**, *104*, 1371–1376, doi:10.1073/pnas.0607038104.
  99. Kedzierski, L.; Tate, M.D.; Hsu, A.C.; Kolesnik, T.B.; Linossi, E.M.; Dagley, L.; Dong, Z.; Freeman, S.; Infusini, G.; Starkey, M.R.; et al. Suppressor of Cytokine Signaling (SOCS)5 Ameliorates Influenza Infection via Inhibition of EGFR Signaling. *Elife* **2017**, *6*, e20444, doi:10.7554/eLife.20444.
  100. Peng, N.; Liu, S.; Xia, Z.; Ren, S.; Feng, J.; Jing, M.; Gao, X.; Wiemer, E.A.C.; Zhu, Y. Inducible Major Vault Protein Plays a Pivotal Role in Double-Stranded RNA- or Virus-Induced Proinflammatory Response. *J Immunol* **2016**, *196*, 2753–2766, doi:10.4049/jimmunol.1501481.
  101. Fu, B.; Wang, L.; Li, S.; Dorf, M.E. ZMPSTE24 Defends against Influenza and Other Pathogenic Viruses. *J Exp Med* **2017**, *214*, 919–929, doi:10.1084/jem.20161270.
  102. Kenney, A.D.; McMichael, T.M.; Imas, A.; Chesarino, N.M.; Zhang, L.; Dorn, L.E.; Wu, Q.; Alfaour, O.; Amari, F.; Chen, M.; et al. IFITM3 Protects the Heart during Influenza Virus Infection. *Proc Natl Acad Sci U S A* **2019**, *116*, 18607–18612, doi:10.1073/pnas.1900784116.
  103. Jia, W.; Li, H.; He, Y.-W. Pattern Recognition Molecule Mindin Promotes Intranasal Clearance of Influenza Viruses. *J Immunol* **2008**, *180*, 6255–6261, doi:10.4049/jimmunol.180.9.6255.
  104. Lu, Q.; Yokoyama, C.C.; Williams, J.W.; Baldridge, M.T.; Jin, X.; DesRochers, B.; Bricker, T.; Wilen, C.B.; Bagaikar, J.; Loginicheva, E.; et al. Homeostatic Control of Innate Lung Inflammation by Vici Syndrome Gene Epg5 and Additional Autophagy Genes Promotes Influenza Pathogenesis. *Cell Host Microbe* **2016**, *19*, 102–113, doi:10.1016/j.chom.2015.12.011.
  105. Downey, J.; Pernet, E.; Coulombe, F.; Allard, B.; Meunier, I.; Jaworska, J.; Qureshi, S.; Vinh, D.C.; Martin, J.G.; Joubert, P.; et al. RIPK3 Interacts with MAVS to Regulate Type I IFN-Mediated Immunity to Influenza A Virus

- Infection. *PLoS Pathog* **2017**, *13*, e1006326, doi:10.1371/journal.ppat.1006326.
106. McMahon, M.; Ye, S.; Izzard, L.; Dlugolenski, D.; Tripp, R.A.; Bean, A.G.D.; McCulloch, D.R.; Stambas, J. Correction: ADAMT5 Is a Critical Regulator of Virus-Specific T Cell Immunity. *PLoS Biol* **2019**, *17*, e3000558, doi:10.1371/journal.pbio.3000558.
  107. Seki, M.; Kohno, S.; Newstead, M.W.; Zeng, X.; Bhan, U.; Lukacs, N.W.; Kunkel, S.L.; Standiford, T.J. Critical Role of IL-1 Receptor-Associated Kinase-M in Regulating Chemokine-Dependent Deleterious Inflammation in Murine Influenza Pneumonia. *J Immunol* **2010**, *184*, 1410–1418, doi:10.4049/jimmunol.0901709.
  108. Hemmers, S.; Teijaro, J.R.; Arandjelovic, S.; Mowen, K.A. PAD4-Mediated Neutrophil Extracellular Trap Formation Is Not Required for Immunity against Influenza Infection. *PLoS One* **2011**, *6*, e22043, doi:10.1371/journal.pone.0022043.
  109. Kandasamy, M.; Suryawanshi, A.; Tundup, S.; Perez, J.T.; Schmolke, M.; Manicassamy, S.; Manicassamy, B. RIG-I Signaling Is Critical for Efficient Polyfunctional T Cell Responses during Influenza Virus Infection. *PLoS Pathog* **2016**, *12*, e1005754, doi:10.1371/journal.ppat.1005754.
  110. Teng, O.; Chen, S.-T.; Hsu, T.-L.; Sia, S.F.; Cole, S.; Valkenburg, S.A.; Hsu, T.-Y.; Zheng, J.T.; Tu, W.; Bruzzone, R.; et al. CLEC5A-Mediated Enhancement of the Inflammatory Response in Myeloid Cells Contributes to Influenza Virus Pathogenicity In Vivo. *J Virol* **2017**, *91*, e01813-16, doi:10.1128/JVI.01813-16.
  111. Li, Q.; Lin, L.; Tong, Y.; Liu, Y.; Mou, J.; Wang, X.; Wang, X.; Gong, Y.; Zhao, Y.; Liu, Y.; et al. TRIM29 Negatively Controls Antiviral Immune Response through Targeting STING for Degradation. *Cell Discov* **2018**, *4*, 13, doi:10.1038/s41421-018-0010-9.
  112. Allen, I.C.; Scull, M.A.; Moore, C.B.; Holl, E.K.; McElvania-TeKippe, E.; Taxman, D.J.; Guthrie, E.H.; Pickles, R.J.; Ting, J.P.-Y. The NLRP3 Inflammasome Mediates in Vivo Innate Immunity to Influenza A Virus through Recognition of Viral RNA. *Immunity* **2009**, *30*, 556–565, doi:10.1016/j.immuni.2009.02.005.
  113. Kim, B.J.; Cho, S.W.; Jeon, Y.J.; An, S.; Jo, A.; Lim, J.H.; Kim, D.-Y.; Won, T.-B.; Han, D.H.; Rhee, C.-S.; et al. Intranasal Delivery of Duox2 DNA Using Cationic Polymer Can Prevent Acute Influenza A Viral Infection in Vivo Lung. *Appl Microbiol Biotechnol* **2018**, *102*, 105–115, doi:10.1007/s00253-017-8512-1.
  114. Moser, E.K.; Sun, J.; Kim, T.S.; Braciale, T.J. IL-21R Signaling Suppresses IL-17+ Gamma Delta T Cell Responses and Production of IL-17 Related Cytokines in the Lung at Steady State and after Influenza A Virus Infection. *PLoS One* **2015**, *10*, e0120169, doi:10.1371/journal.pone.0120169.
  115. Jeisy-Scott, V.; Davis, W.G.; Patel, J.R.; Bowzard, J.B.; Shieh, W.-J.; Zaki, S.R.; Katz, J.M.; Sambhara, S. Increased MDSC Accumulation and Th2 Biased Response to Influenza A Virus Infection in the Absence of TLR7 in Mice. *PLoS One* **2011**, *6*, e25242, doi:10.1371/journal.pone.0025242.
  116. Wang, Y.; Sharma, P.; Jefferson, M.; Zhang, W.; Bone, B.; Kipar, A.; Bitto, D.; Coombes, J.L.; Pearson, T.; Man, A.; et al. Non-Canonical Autophagy Functions of ATG16L1 in Epithelial Cells Limit Lethal Infection by Influenza A Virus. *EMBO J* **2021**, *40*, e105543, doi:10.15252/embj.2020105543.
  117. Wein, A.N.; Dunbar, P.R.; McMaster, S.R.; Li, Z.-R.T.; Denning, T.L.; Kohlmeier, J.E. IL-36 $\gamma$  Protects against Severe Influenza Infection by Promoting Lung Alveolar Macrophage Survival and Limiting Viral Replication. *J Immunol* **2018**, *201*, 573–582, doi:10.4049/jimmunol.1701796.
  118. Zou, Z.; Yan, Y.; Shu, Y.; Gao, R.; Sun, Y.; Li, X.; Ju, X.; Liang, Z.; Liu, Q.; Zhao, Y.; et al. Angiotensin-Converting Enzyme 2 Protects from Lethal Avian Influenza A H5N1 Infections. *Nat Commun* **2014**, *5*, 3594, doi:10.1038/ncomms4594.
  119. Le Bel, M.; Gosselin, J. Leukotriene B4 Enhances NOD2-Dependent Innate Response against Influenza Virus Infection. *PLoS One* **2015**, *10*, e0139856, doi:10.1371/journal.pone.0139856.
  120. Uematsu, T.; Iizasa, E.; Kobayashi, N.; Yoshida, H.; Hara, H. Loss of CARD9-Mediated Innate Activation Attenuates Severe Influenza Pneumonia without Compromising Host Viral Immunity. *Sci Rep* **2015**, *5*, 17577, doi:10.1038/srep17577.
  121. Allen, I.C.; Moore, C.B.; Schneider, M.; Lei, Y.; Davis, B.K.; Scull, M.A.; Gris, D.; Roney, K.E.; Zimmermann, A.G.; Bowzard, J.B.; et al. NLRX1 Protein Attenuates Inflammatory Responses to Infection by Interfering with the RIG-I-MAVS and TRAF6-NF-KB Signaling Pathways. *Immunity* **2011**, *34*, 854–865, doi:10.1016/j.immuni.2011.03.026.
  122. Thapa, R.J.; Ingram, J.P.; Ragan, K.B.; Nogusa, S.; Boyd, D.F.; Benitez, A.A.; Sridharan, H.; Kosoff, R.; Shubina, M.; Landsteiner, V.J.; et al. DAI Senses Influenza A Virus Genomic RNA and Activates RIPK3-Dependent Cell Death. *Cell Host Microbe* **2016**, *20*, 674–681, doi:10.1016/j.chom.2016.09.014.
  123. Lafferty, E.I.; Flaczyk, A.; Angers, I.; Homer, R.; d’Hennezel, E.; Malo, D.; Piccirillo, C.A.; Vidal, S.M.; Qureshi, S.T. An ENU-Induced Splicing Mutation Reveals a Role for Unc93b1 in Early Immune Cell Activation Following Influenza A H1N1 Infection. *Genes Immun* **2014**, *15*, 320–332, doi:10.1038/gene.2014.22.
  124. Seo, G.J.; Kim, C.; Shin, W.-J.; Sklan, E.H.; Eoh, H.; Jung, J.U. TRIM56-Mediated Monoubiquitination of CGAS for Cytosolic DNA Sensing. *Nat Commun* **2018**, *9*, 613, doi:10.1038/s41467-018-02936-3.
  125. Lupfer, C.R.; Stokes, K.L.; Kuriakose, T.; Kanneganti, T.-D. Deficiency of the NOD-Like Receptor NLRC5 Results in Decreased CD8+ T Cell Function and Impaired Viral Clearance. *J Virol* **2017**, *91*, e00377-17,

doi:10.1128/JVI.00377-17.

126. Tan, K.S.; Olfat, F.; Phoon, M.C.; Hsu, J.P.; Howe, J.L.C.; Seet, J.E.; Chin, K.C.; Chow, V.T.K. In Vivo and in Vitro Studies on the Antiviral Activities of Viperin against Influenza H1N1 Virus Infection. *J Gen Virol* **2012**, *93*, 1269–1277, doi:10.1099/vir.0.040824-0.
127. Khoufache, K.; Berri, F.; Nacken, W.; Vogel, A.B.; Delenne, M.; Camerer, E.; Coughlin, S.R.; Carmeliet, P.; Lina, B.; Rimmelzwaan, G.F.; et al. PAR1 Contributes to Influenza A Virus Pathogenicity in Mice. *J Clin Invest* **2013**, *123*, 206–214, doi:10.1172/JCI61667.
128. Major, J.; Crotta, S.; Llorian, M.; McCabe, T.M.; Gad, H.H.; Priestnall, S.L.; Hartmann, R.; Wack, A. Type I and III Interferons Disrupt Lung Epithelial Repair during Recovery from Viral Infection. *Science* **2020**, *369*, 712–717, doi:10.1126/science.abc2061.
129. Oltean, T.; Van San, E.; Divert, T.; Vanden Berghe, T.; Saelens, X.; Maelfait, J.; Takahashi, N.; Vandenabeele, P. Viral Dosing of Influenza A Infection Reveals Involvement of RIPK3 and FADD, but Not MLKL. *Cell Death Dis* **2021**, *12*, 471, doi:10.1038/s41419-021-03746-0.
130. Ito, T.; Itakura, J.; Takahashi, S.; Sato, M.; Mino, M.; Fushimi, S.; Yamada, M.; Morishima, T.; Kunkel, S.L.; Matsukawa, A. Sprouty-Related Ena/Vasodilator-Stimulated Phosphoprotein Homology 1-Domain-Containing Protein-2 Critically Regulates Influenza A Virus-Induced Pneumonia. *Crit Care Med* **2016**, *44*, e530-543, doi:10.1097/CCM.0000000000001562.
131. Ramirez-Ortiz, Z.G.; Prasad, A.; Griffith, J.W.; Pendergraft, W.F.; Cowley, G.S.; Root, D.E.; Tai, M.; Luster, A.D.; El Khoury, J.; Hacohen, N.; et al. The Receptor TREML4 Amplifies TLR7-Mediated Signaling during Antiviral Responses and Autoimmunity. *Nat Immunol* **2015**, *16*, 495–504, doi:10.1038/ni.3143.
132. LeVine, A.M.; Hartshorn, K.; Elliott, J.; Whitsett, J.; Korfhagen, T. Absence of SP-A Modulates Innate and Adaptive Defense Responses to Pulmonary Influenza Infection. *Am J Physiol Lung Cell Mol Physiol* **2002**, *282*, L563-572, doi:10.1152/ajplung.00280.2001.
133. Nair, S.; Huynh, J.P.; Lampropoulou, V.; Loginicheva, E.; Esaulova, E.; Gounder, A.P.; Boon, A.C.M.; Schwarzkopf, E.A.; Bradstreet, T.R.; Edelson, B.T.; et al. Irg1 Expression in Myeloid Cells Prevents Immunopathology during M. Tuberculosis Infection. *J Exp Med* **2018**, *215*, 1035–1045, doi:10.1084/jem.20180118.
